# Supplementary material for: Use of CompEx in eosinophilic patients with severe, uncontrolled asthma on benralizumab
Source: PubMed Central journal article supplement (PMC10945385; doi:10.1183/23120541.01025-2023), 2024-03-18
Supplement: 01025-2023.SUPPLEMENT.pdf [file 01025-2023.SUPPLEMENT.pdf]

**a. CompEx**

**SIROCCO**

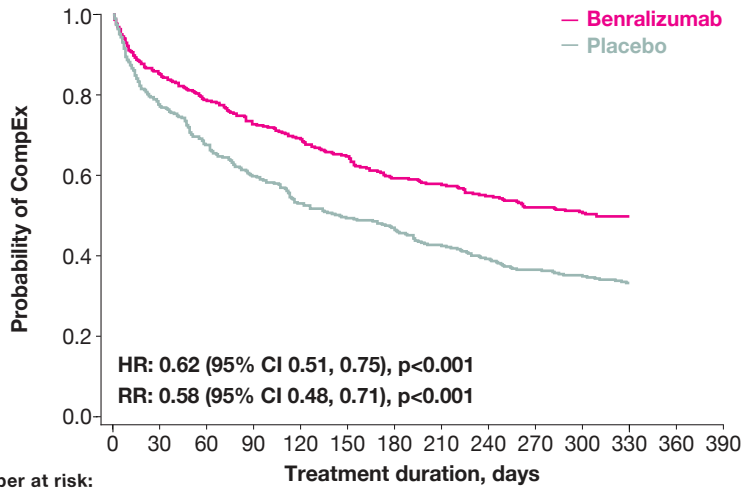

Number at risk:

|                     |     |     |     |     |     |     |     |     |     |     |     |     |   |   |
|---------------------|-----|-----|-----|-----|-----|-----|-----|-----|-----|-----|-----|-----|---|---|
| <b>Benralizumab</b> | 383 | 325 | 299 | 275 | 260 | 240 | 216 | 209 | 197 | 186 | 182 | 177 | - | - |
| <b>Placebo</b>      | 389 | 302 | 261 | 230 | 204 | 187 | 177 | 160 | 146 | 135 | 128 | 119 | - | - |

**CALIMA**

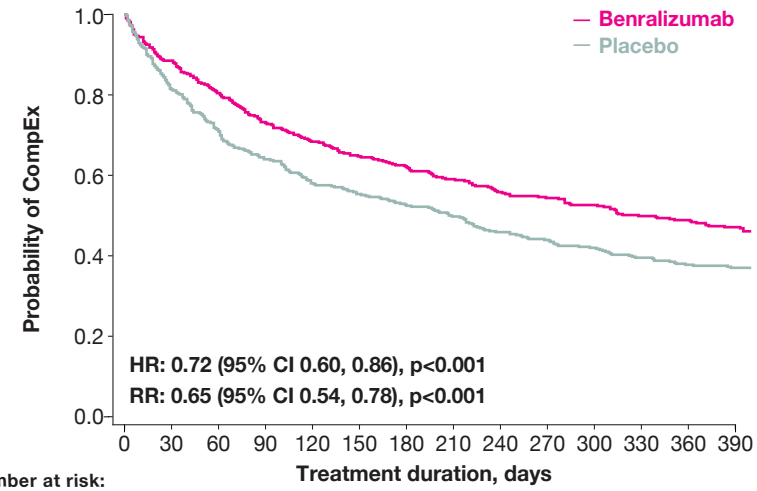

Number at risk:

|                     |     |     |     |     |     |     |     |     |     |     |     |     |     |     |
|---------------------|-----|-----|-----|-----|-----|-----|-----|-----|-----|-----|-----|-----|-----|-----|
| <b>Benralizumab</b> | 428 | 376 | 337 | 302 | 281 | 266 | 252 | 239 | 226 | 220 | 212 | 200 | 195 | 183 |
| <b>Placebo</b>      | 425 | 345 | 300 | 268 | 242 | 228 | 217 | 205 | 189 | 181 | 172 | 160 | 151 | 141 |

**b. SevEx**

**SIROCCO**

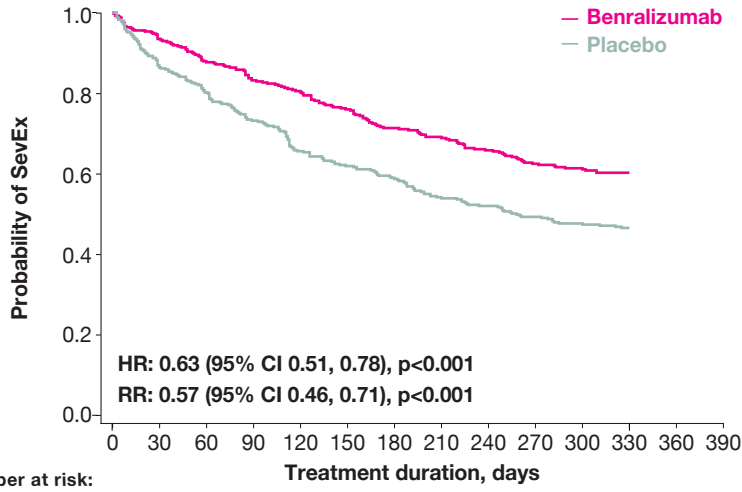

Number at risk:

|                     |     |     |     |     |     |     |     |     |     |     |     |     |   |   |
|---------------------|-----|-----|-----|-----|-----|-----|-----|-----|-----|-----|-----|-----|---|---|
| <b>Benralizumab</b> | 383 | 355 | 333 | 314 | 301 | 281 | 260 | 250 | 237 | 224 | 220 | 215 | - | - |
| <b>Placebo</b>      | 389 | 338 | 309 | 280 | 250 | 233 | 221 | 201 | 192 | 181 | 173 | 167 | - | - |

**CALIMA**

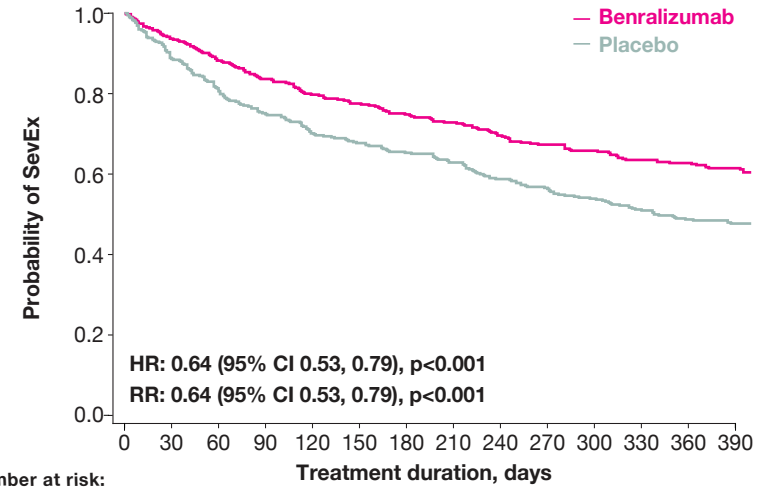

Number at risk:

|                     |     |     |     |     |     |     |     |     |     |     |     |     |     |     |
|---------------------|-----|-----|-----|-----|-----|-----|-----|-----|-----|-----|-----|-----|-----|-----|
| <b>Benralizumab</b> | 428 | 398 | 370 | 344 | 326 | 316 | 301 | 292 | 278 | 267 | 259 | 249 | 244 | 233 |
| <b>Placebo</b>      | 425 | 376 | 342 | 315 | 293 | 280 | 270 | 260 | 242 | 233 | 221 | 208 | 196 | 182 |

**c. AWE**

**SIROCCO**

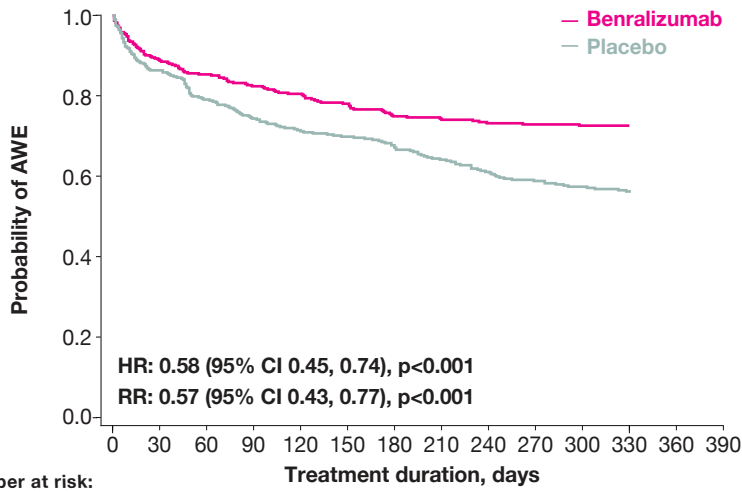

Number at risk:

|                     |     |     |     |     |     |     |     |     |     |     |     |     |   |   |
|---------------------|-----|-----|-----|-----|-----|-----|-----|-----|-----|-----|-----|-----|---|---|
| <b>Benralizumab</b> | 383 | 339 | 323 | 307 | 298 | 277 | 263 | 258 | 252 | 247 | 242 | 232 | - | - |
| <b>Placebo</b>      | 389 | 334 | 303 | 282 | 269 | 261 | 248 | 233 | 218 | 208 | 200 | 182 | - | - |

**CALIMA**

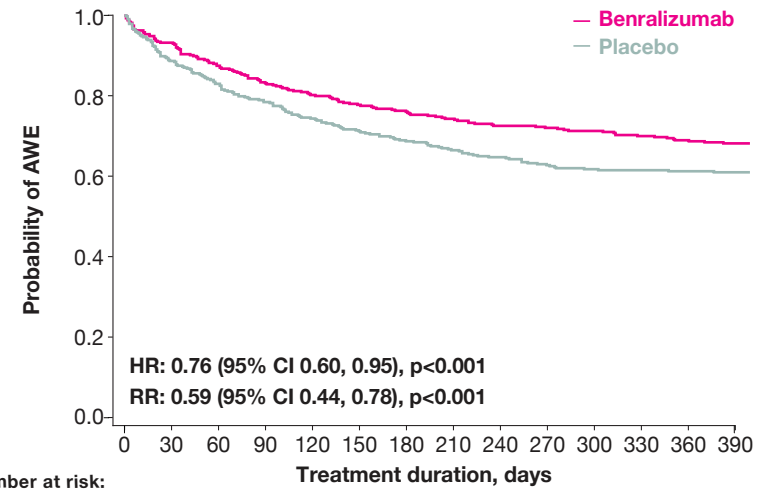

Number at risk:

|                     |     |     |     |     |     |     |     |     |     |     |     |     |     |     |
|---------------------|-----|-----|-----|-----|-----|-----|-----|-----|-----|-----|-----|-----|-----|-----|
| <b>Benralizumab</b> | 427 | 393 | 363 | 343 | 329 | 318 | 307 | 297 | 289 | 285 | 280 | 274 | 267 | 246 |
| <b>Placebo</b>      | 425 | 375 | 349 | 326 | 306 | 290 | 279 | 269 | 262 | 253 | 247 | 243 | 238 | 224 |
